# Supplementary material for: Photosensitive poly(o-nitrobenzyloxycarbonyl-l-lysine)-b-PEO polypeptide copolymers: synthesis, multiple self-assembly behaviors, and the photo/pH-thermo-sensitive hydrogels
Source: Royal Society of Chemistry journal article supplement (doi:10.1039/c7py01574g), 2017-01-01
Supplement: c7py01574g1.pdf [file c7py01574g1.pdf]

## Supporting Information

### Photosensitive Poly(*o*-nitrobenzyloxycarbonyl-L-lysine)-*b*-PEO Polypeptide Copolymers: Synthesis, Multiple Self-Assembly Behaviors, and the Photo/pH-Thermo-Sensitive Hydrogels

Pan Li, Jiacheng Zhang, Chang-Ming Dong\*

School of Chemistry and Chemical Engineering, Shanghai Key Laboratory of Electrical Insulation and Thermal Aging, Shanghai Jiao Tong University, Shanghai 200240, P. R. China

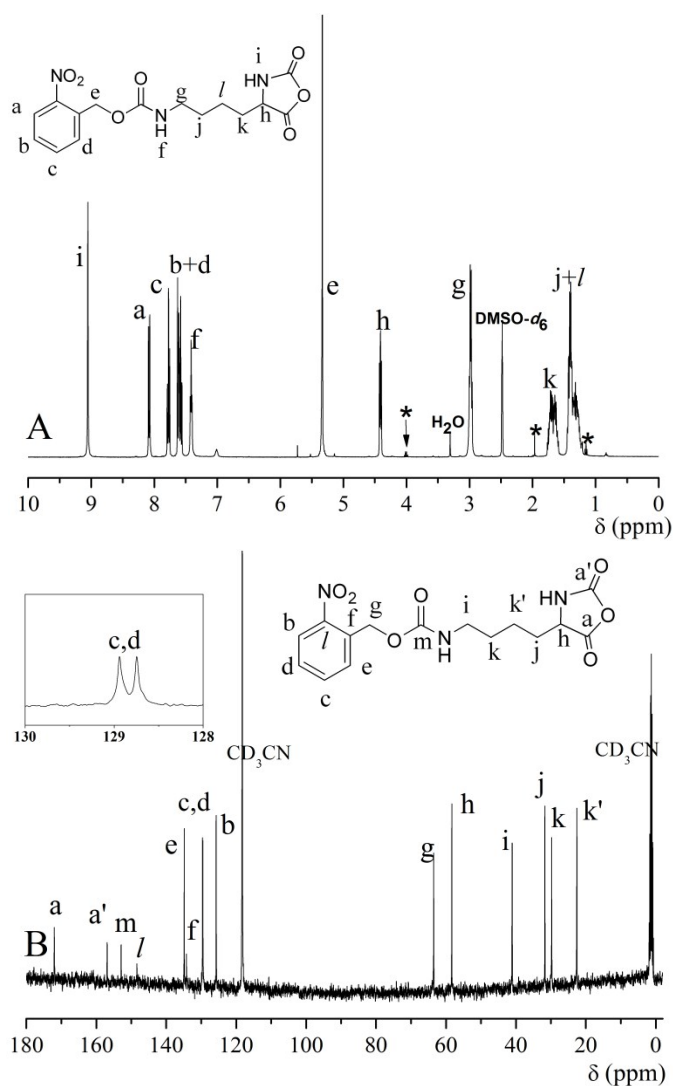

**Figure S1.**  $^1\text{H}$  NMR spectrum of *o*NB-Lys NCA in  $\text{DMSO-}d_6$  (A) and its  $^{13}\text{C}$  NMR spectrum in  $\text{CD}_3\text{CN}$  (B) (“\*” denotes the EtOAc solvent peaks).

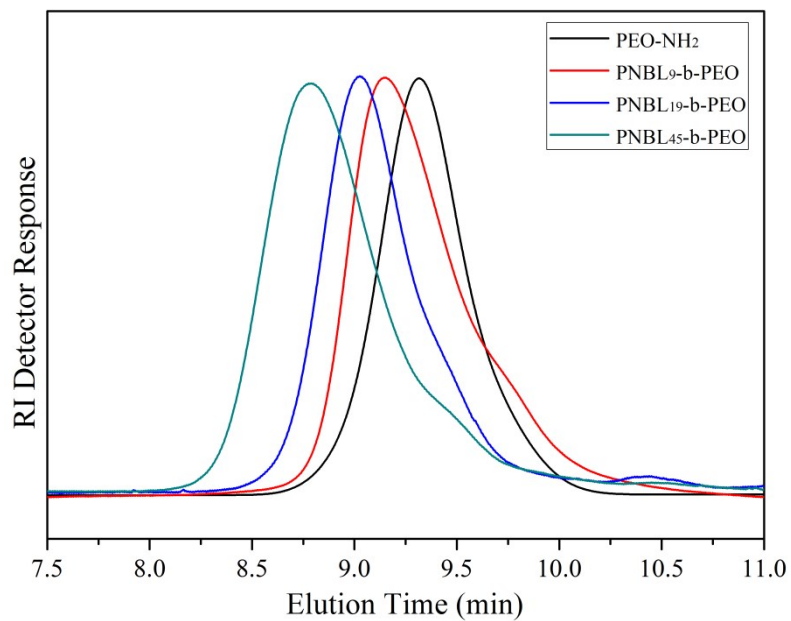

**Figure S2.** GPC traces of the PEO-NH<sub>2</sub> and PNBL-b-PEO block copolymers.

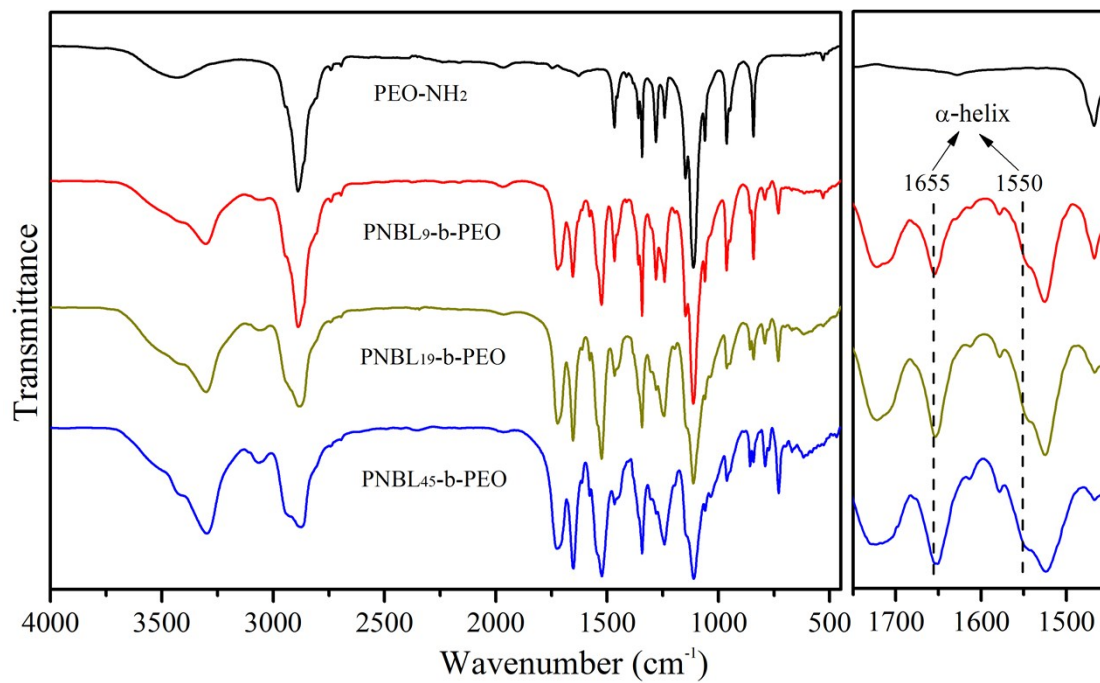

**Figure S3.** FT-IR spectra of the PEO-NH<sub>2</sub> and PNBL-b-PEO block copolymers.

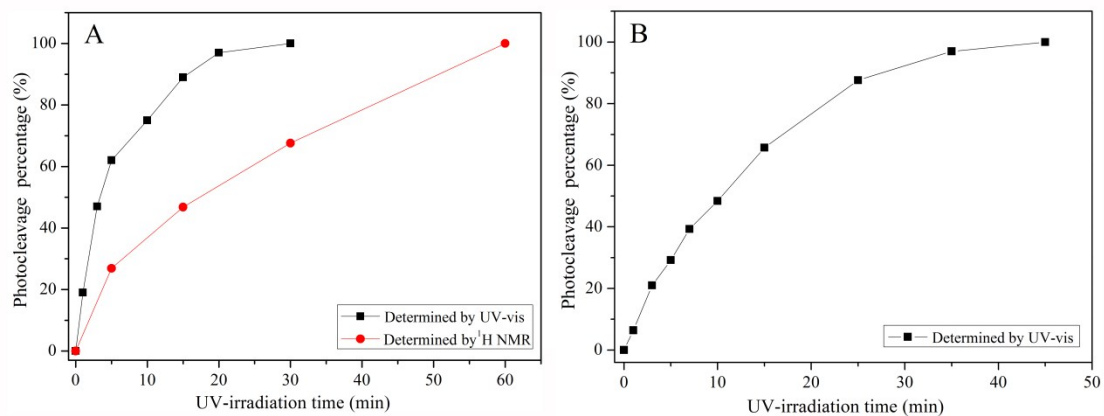

**Figure S4.** Photocleavage percentage of oNB group of PNBL<sub>9</sub>-b-PEO in methanol solution (A) and in aqueous solution (B).

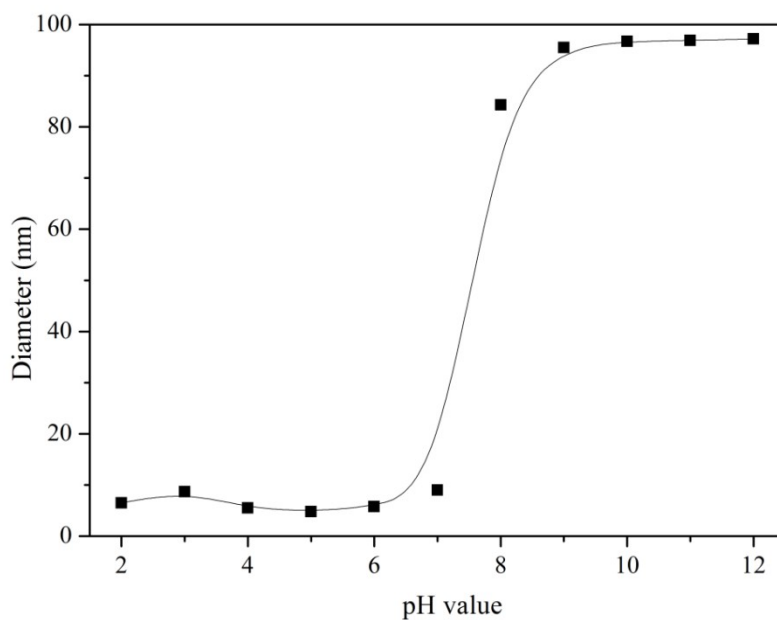

**Figure S5.** DLS-averaged diameter of PLys<sub>9</sub>-b-PEO micelles as a function of pH.

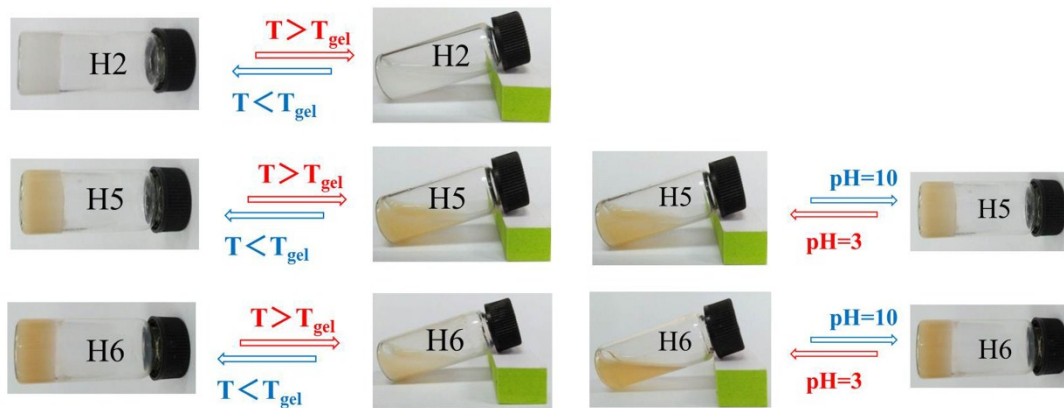

(A) Thermo-sensitive hydrogel

(B) pH-Sensitive hydrogel

**Figure S6.** Digital images of thermo-sensitive hydrogels H2, H5 and H6 (A) and pH-sensitive hydrogels H5 and H6 (B).

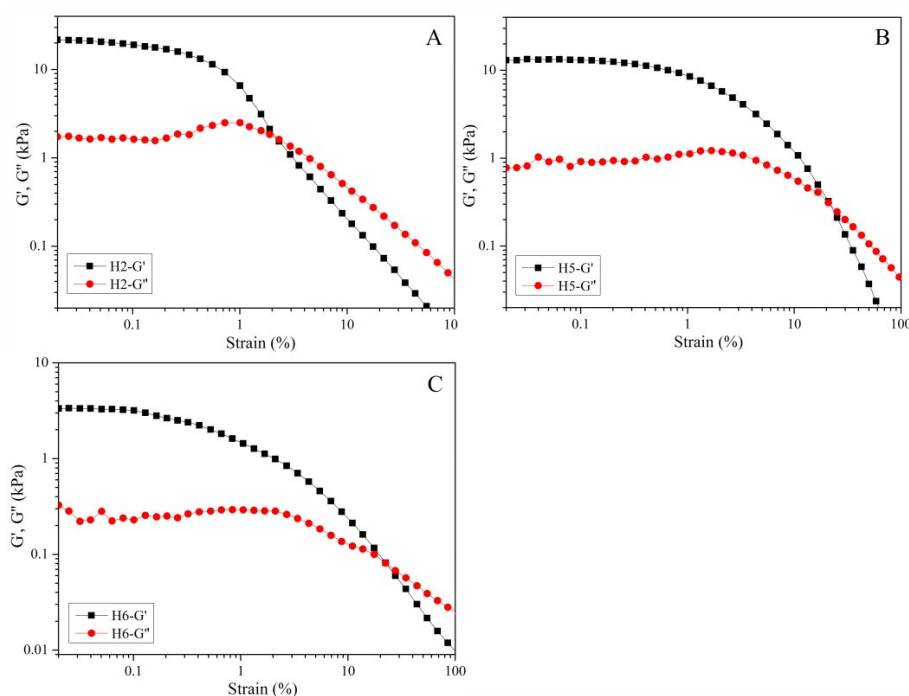

**Figure S7.** Storage ( $G'$ ) and ( $G''$ ) loss modulus as a function of strain for hydrogels H2, H5 and H6.

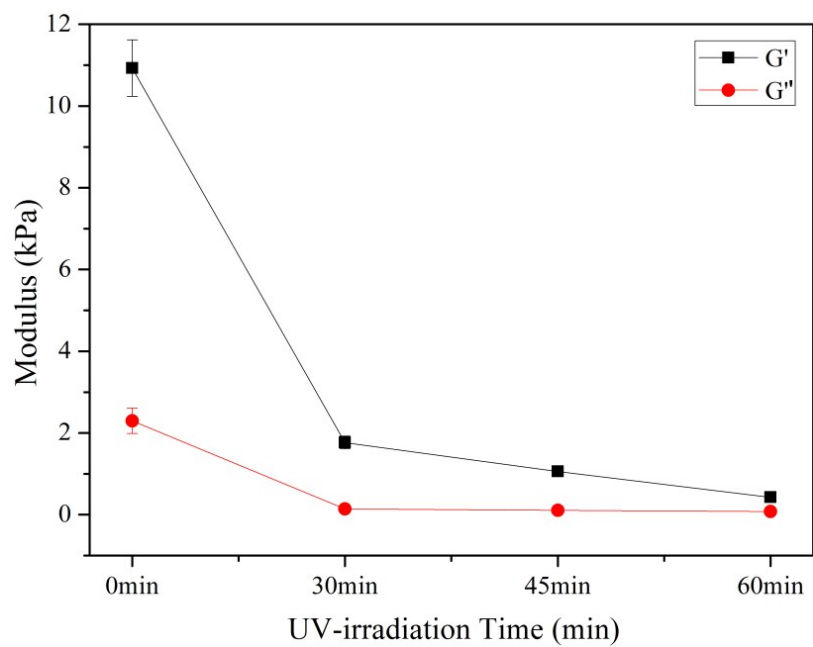

**Figure S8.** Dependence of UV cleavage time on the hydrogel mechanical properties.

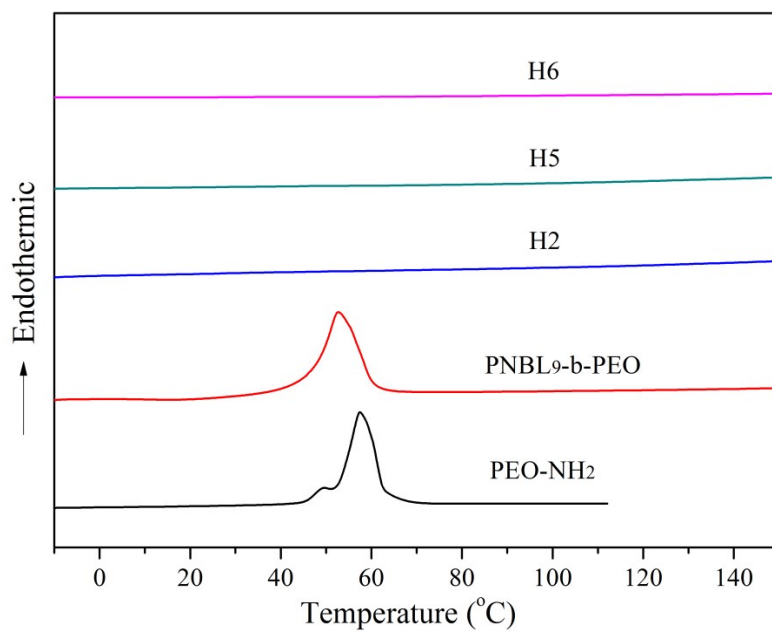

**Figure S9.** DSC curves of PEO-NH<sub>2</sub>, PNBL<sub>9</sub>-b-PEO, hydrogel H2, H5 and H6 in the second heating run.

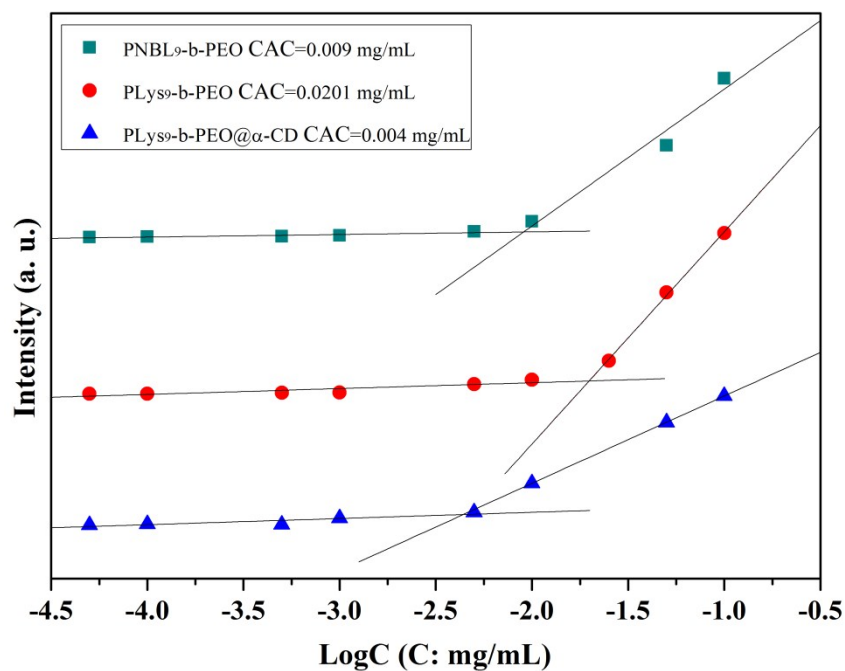

**Figure S10.** The relationship of the absorbance intensity of DPH as a function of copolymer concentration of PNBL<sub>9</sub>-b-PEO (pH=7.5), PLys<sub>9</sub>-b-PEO (pH=10) and PLys<sub>9</sub>-b-PEO@α-CD (pH=3) respectively.
